# Supplementary material for: Exploration of the Diversity of Vicine and Convicine Derivatives in Faba Bean (Vicia faba L.) Cultivars: Insights from LC-MS/MS Spectra
Source: MDPI journal article supplement (doi:10.3390/molecules29051065), 2024-02-29
Supplement: s1 [file s1]

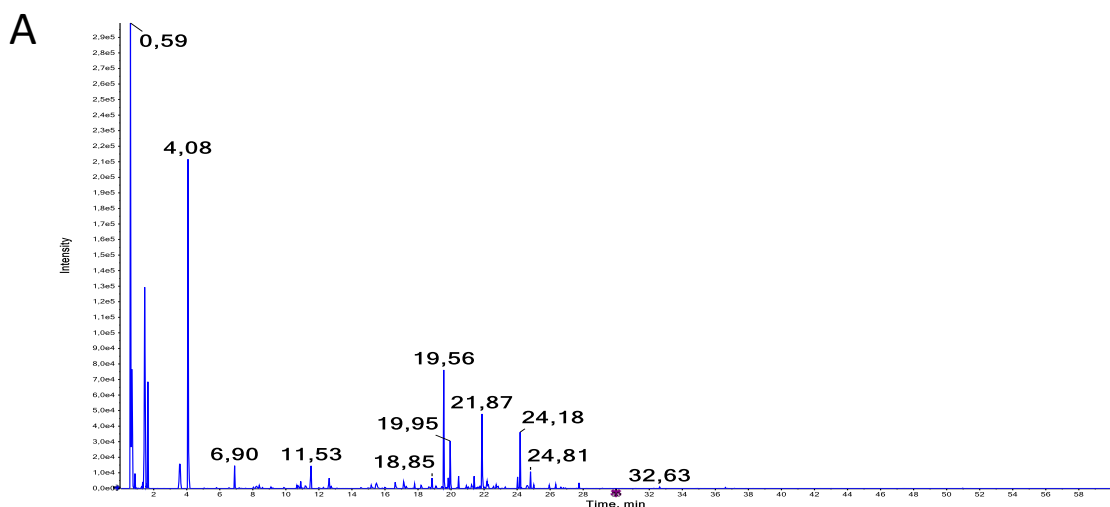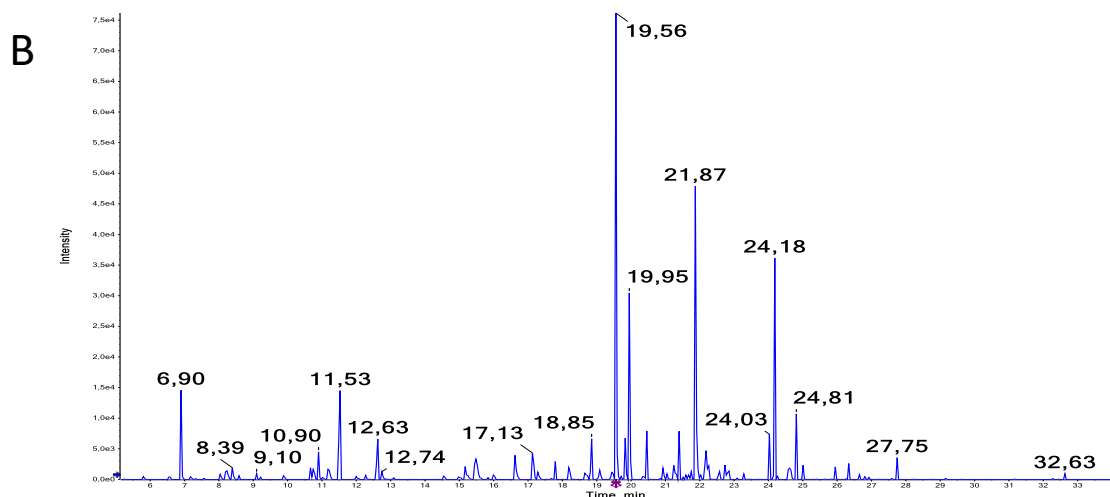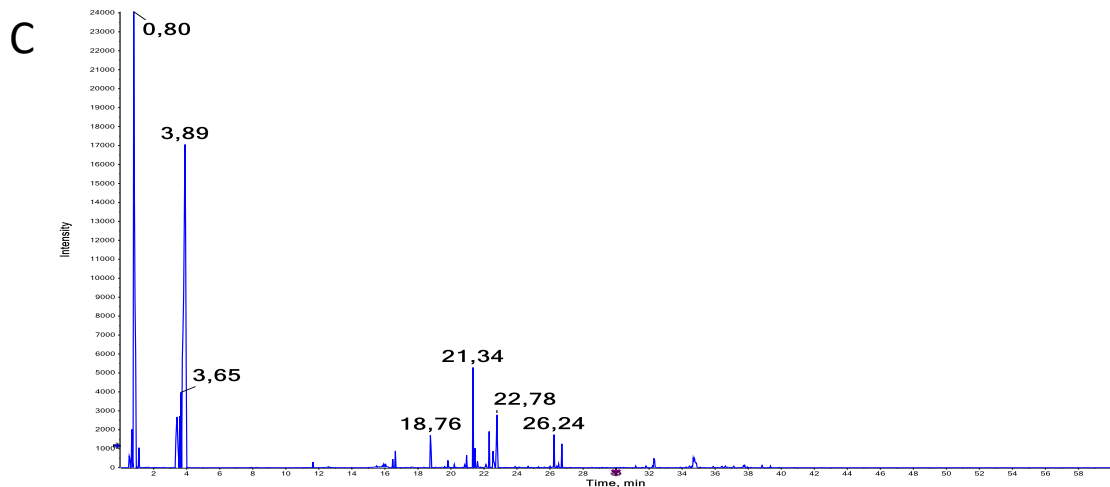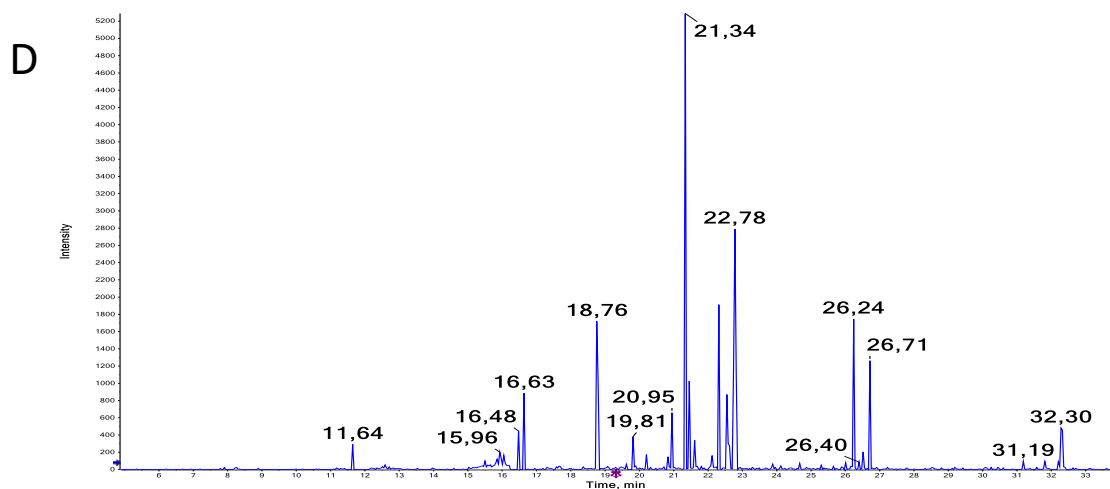

Supplemental Figure S1: Extracted fragment ion chromatogram of the fragment at 141.03+/-0.015, thus covering the base peak fragment of vicine and convicine. A & B: respectively full range and range from retention time 5 to 35 minutes of the roots sample from variety A. C & D: respectively full range and from retention time 5 to 35 minutes of the pool of extracts from 18 different faba bean varieties
