# Supplementary material for: Exploration of the Diversity of Vicine and Convicine Derivatives in Faba Bean (Vicia faba L.) Cultivars: Insights from LC-MS/MS Spectra
Source: Molecules. 2024 Feb 29;29(5):1065. doi: 10.3390/molecules29051065 (PMC10934171; doi:10.3390/molecules29051065)
Supplement: Supplementary file 1 [file molecules-29-01065-s001.zip › Supplemental Table S1.xlsx]

## Sheet: Sheet1
RTa	m/zb	Anovab	FCc	Maxd	Mind	Intb	Partial identification
5.72	585.168	3.2e-06	6.39	C shoots	E shoots	1102.46	convicine, vicine homologue not fragmented
8.15	423.114	0.0016	2.56	B shoots	D shoots	668.95	convicine
8.15	586.138	0.0024	5.9	B shoots	D shoots	1526.43	convicine
8.23	430.109	0.00196279	2.90174	C shoots	E shoots	179.736	convicine
9.13	429.124	0.000385328	4.07537	B shoots	E shoots	82.3855	vicine
9.2	422.13	0.00103	3.61	B shoots	E shoots	821.332	vicine
10.49	471.136	0.000430175	3.63603	B shoots	D shoots	196.025	convicine
10.73	470.15	1.45776e-05	8.74779	B shoots	E shoots	435.385	vicine
10.85	505.177	0.00145658	2.42873	A shoots	D shoots	331.18	convicine
11.04	504.193	0.00253099	1.87819	B shoots	D shoots	131.426	vicine
11.78	501.182	5.62551e-06	10.3423	A shoots	D shoots	212.605	convicine
12.92	500.198	3.36751e-05	7.56154	A shoots	D shoots	328.407	vicine
13.31	469.12	2.75251e-05	4.65923	C shoots	D shoots	249.109	convicine
14.28	468.135	5.4794e-05	3.34998	B shoots	E shoots	211.529	vicine
17.21	502.126	0.00102958	7.09819	C shoots	D shoots	208.834	convicine
17.68	705.207	1.75489e-07	19.3285	B shoots	E shoots	280.201	vicine
17.72	643.208	1.49052e-07	12.1488	B shoots	E shoots	184.174	vicine
18.23	803.246	7.6817e-05	5.60224	A shoots	E shoots	448.945	contains vicine ferulate
19.17	611.181	9.03842e-06	56.9895	A shoots	E shoots	170.145	vicine
20.22	501.216	1.24291e-07	6.08708	D shoots	A shoots	429.735	vicine
21	809.298	0.0416467	3.44708	E shoots	B shoots	174.814	vicine, convicine homologue at RT 20.43 not fragmented
22.76	694.291	0.000310899	23.5552	B shoots	E shoots	377.05	vicine
23.19	501.218	3.59128e-05	6.94677	A shoots	E shoots	156.521	convicine
23.78	658.187	2.39473e-08	11.0561	B shoots	E shoots	880.569	convicine
23.94	1100.31	3.48189e-05	3.14757	A shoots	E shoots	1685.03	convicine, MS/MS indicates ferulic acid but it is not feruloyl convicine (no peak at 480)
24.13	1099.32	3.77247e-07	2.58474	A shoots	E shoots	2127.25	vicine, MS/MS indicates ferulic acid but it is not feruloyl vicine (no peak at 479)
24.13	657.202	5.22516e-08	13.1043	B shoots	E shoots	1064.29	vicine
24.25	726.236	3.41588e-06	3.97595	A shoots	B shoots	653.353	feruloyl convicine
24.29	986.326	6.62882e-05	3.18194	E shoots	D shoots	2104.71	contains feruoyl convicine
24.57	725.253	7.6349e-05	3.1333	A shoots	B shoots	270.965	feruloyl vicine
24.6	756.244	3.93787e-07	18.8923	B shoots	E shoots	2097.03	convicine
24.6	985.339	8.69396e-05	2.87352	A shoots	D shoots	2487.78	contains feruoyl vicine
24.84	755.26	2.8026e-08	20.4191	B shoots	E shoots	6276.07	vicine
25.19	824.275	2.53172e-06	7.47357	E shoots	B shoots	2270.16	contains convicine + C10H14O3
25.55	823.287	0.010021	3.23452	A shoots	B shoots	1770.43	contains vicine + C10H14O3
26.02	1093.36	0.000204647	68.4048	B shoots	E shoots	201.646	contains feruoyl vicine, convicine homologue observed at RT 25.79 but not fragmented
26.13	882.335	5.45535e-07	13.5375	A shoots	D shoots	525.848	convicine
26.29	500.221	7.59043e-05	4.5897	A shoots	D shoots	233.127	convicine
26.33	881.349	8.07979e-06	6.84752	A shoots	D shoots	1666.1	vicine
26.84	499.237	6.58274e-06	6.39974	A shoots	D shoots	337.921	vicine
26.88	719.298	0.00377608	2.04695	C shoots	D shoots	899.91	vicine
27.08	720.322	0.00126276	4.21134	D shoots	A shoots	256.585	vicine & convicine (losses of 287/286)
a: retention time in minutes; b: based on the output of progenesis QI, the given intensity is the normalized average MS signal intensity of the variety with the highest value; c: maximum fold change based on the average normalized intensity of the different varieties; d: variety with the highest respectively lowest average MS signal intensity e: mass error in ppm between the experimental m/z and …
