# Supplementary material for: Exploration of the Diversity of Vicine and Convicine Derivatives in Faba Bean (Vicia faba L.) Cultivars: Insights from LC-MS/MS Spectra
Source: Molecules. 2024 Feb 29;29(5):1065. doi: 10.3390/molecules29051065 (PMC10934171; doi:10.3390/molecules29051065)
Supplement: Supplementary file 1 [file molecules-29-01065-s001.zip › Supplemental Table S2.xlsx]

## Sheet: Sheet1
								Normalised abundance
								A shoots			Average A shoots	B shoots			Average B shoots	C shoots			Average C shoots	D shoots			Average D shoots	E shoots			Average E shoots
# as in table 1	ID as in table 1	m/z	Anova (p)	q Value	Max Fold Change	Highest Mean	Lowest Mean	Shoot A rep 1	Shoot A rep 2	Shoot A rep 3		Shoot B rep 1	Shoot B rep 2	Shoot B rep 3		Shoot C rep 1	Shoot C rep 2	Shoot C rep 3		Shoot D rep 1	Shoot D rep 2	Shoot D rep 3		Shoot E rep 1	Shoot E rep 2	Shoot E rep 3		Formula	Mass Error (ppm)	MS/MS fragments reaching more than 10% of the intensity of the base peak, ordered from high intensity to lower
1	VC	303.094	1.59177e-09	3.26427e-08	7.45135	B shoots	E shoots	52812	50136.9	43216.3	48721.7	65178.2	83616.9	77989.5	75594.9	29606.6	35874.1	33986.6	33155.8	21774.1	21300.9	20690.5	21255.1	9902.53	11053.8	9479.09	10145.1	C10H16N4O7	-0.79852	141.0419, 140.0342, 99.0199
2	CV	304.079	7.94439e-06	1.3134e-05	5.66075	B shoots	E shoots	132885	119106	115231	122407	172414	114810	126971	138065	87105.9	92632	99520.8	93086.3	34014.8	30977	25333.2	30108.3	13662.5	24675.5	34831.5	24389.8	C10H15N3O8	2.25571	141.0226, 98.0128
3	CV Hex	466.131	6.95844e-05	5.90562e-05	9.56896	C shoots	D shoots	3558.68	5146.65	4486.52	4397.28	3692.54	3914	3556.41	3720.98	3362.02	3028.98	10450	5613.67	551.994	611.034	596.936	586.655	715.71	1492.71	916.597	1041.67	C16H25N3O13	-1.89582	161.0432, 59.0135, 98.0101, 141.0365, 89.0235, 71.0124
4	VC Hex	465.145	7.21579e-05	6.0407e-05	7.57835	C shoots	D shoots	3914.26	5767.93	4878.13	4853.44	4793.68	4771.19	4637.01	4733.96	3461.89	3381.72	10876.1	5906.56	745.47	782.822	809.906	779.399	772.229	1532.2	1014.07	1106.16	C16H26N4O12	-5.75424	141.0185, 161.0461, 59.0147, 98.0128, 89.0248, 71.0145, 101.0246, 113.0246
5	malonyl CV	390.078	1.21461e-10	4.87788e-09	38.9694	A shoots	E shoots	52527.4	60452.1	60415	57798.2	68672	54772.5	50403.2	57949.2	36943.6	46901.6	51483.4	45109.5	971.252	988.371	1108.54	1022.72	769.093	895.048	876.146	846.762	C13H17N3O11	-1.68293	141.0187, 98.0124, 59.0140, 142.0257, 111.0200
6	malonyl VC	389.093	3.84901e-08	3.51088e-07	22.8616	B shoots	E shoots	6888.65	9174.55	8673.78	8245.66	8653.65	11505.8	9813.79	9991.09	4921.01	7048.59	8406.08	6791.89	563.64	549.331	682.559	598.51	244.512	250.724	218.681	237.972	C13H18N4O10	-4.56144	141.0413, 140.0330, 99.0198
7	hydroxyadipoyl CV	448.12	1.68229e-08	1.9076e-07	237.077	B shoots	E shoots	4059.91	4907.86	4712.87	4560.21	30207.7	29104.1	11367.8	23559.9	4092.68	12417.5	8789.94	8433.37	165.792	186.674	208.417	186.961	101.36	113.821	82.9481	99.3763	C16H23N3O12	-2.94903	141.0176, 304.0766, 111.0197, 98.0119, 142.0250, 161.0447
8	hydroxyadipoyl VC	447.136	1.95787e-09	3.87755e-08	79.874	B shoots	E shoots	14936.4	18034.2	18329.7	17100.1	29089.8	28933.3	19257.3	25760.1	6320.59	15031.9	11952.6	11101.7	581.452	673.713	751.832	668.999	377.559	306.015	283.954	322.509	C16H24N4O11	-2.10148	141.0411
9	hydroxyadipoyl CV	448.118	5.07032e-06	9.77037e-06	487.462	B shoots	E shoots	25.5239	36.7707	53.4315	38.5754	423.277	461.484	127.454	337.405	57.2586	174.493	91.7319	107.828	4.49795	0	1.48532	1.99442	0.490739	0	1.58576	0.692167	C16H23N3O12	-5.93046	141.0176, 304.0766, 111.0197, 98.0119, 142.0250, 161.0447
10	CV + C6H3NO	409.097	0.000102927	7.78079e-05	3.21841	B shoots	D shoots	355.458	463.525	421.057	413.347	591.964	358.056	352.423	434.148	242.513	453.188	428.891	374.864	154.634	113.418	136.633	134.895	156.025	147.49	132.05	145.188	C16H18N4O9	-7.9164	141.0172, 122.0250, 98.0112, 78.0355
11	CV + C5H8O2	404.13	0.000157793	0.000105344	4.0755	A shoots	E shoots	1112.85	1366.39	1419.62	1299.62	1110.83	542.005	673.955	775.598	388.705	642.96	655.445	562.37	412.768	406.338	387.208	402.105	296.536	363.93	296.19	318.886	C15H23N3O10	-3.78003	141.0162, 98.0105
12	CV + C3H4O	360.104	1.82772e-05	2.30278e-05	3.43016	A shoots	D shoots	153.369	194.524	182.304	176.732	97.8803	63.276	72.7653	77.9739	123.01	169.163	196.839	163.004	58.4917	46.3263	49.7509	51.523	73.7074	53.3011	56.7768	61.2618	C13H19N3O9	-3.24158	141.0168
13	VC + C6H3NO	408.114	4.23134e-06	8.73928e-06	5.40002	B shoots	E shoots	196.236	270.189	270.618	245.681	377.79	324.661	303.035	335.162	89.0884	153.431	135.697	126.072	84.8417	70.7595	68.2116	74.6043	79.9675	48.7046	57.5281	62.0667	C16H19N5O8	-5.11458	141.04106, 99.02064, 78.0350, 140.0350
14	VC + C5H8O2	403.145	4.9795e-05	4.65513e-05	3.96539	A shoots	E shoots	1256.98	1520.92	1658.34	1478.75	1916.44	1215.58	1256.13	1462.72	404.75	698.29	641.757	581.599	776.814	696.854	674.143	715.937	479.907	341.371	297.463	372.914	C15H24N4O9	-5.01759	141.0399, 140.0324, 99.0187
15	VC + C5H8O2	403.145	1.05349e-06	3.48725e-06	4.91292	B shoots	E shoots	788.316	792.974	714.495	765.262	1411.2	1467.69	1161.48	1346.79	304.768	410.718	418.698	378.061	597.765	509.008	507.651	538.141	348.88	239.314	234.205	274.133	C15H24N4O9	-4.45437	141.0399, 140.0324, 99.0187
16	VC + hydroxybenzoic acid Hex	585.17	1.47247e-05	2.00455e-05	9.64887	A shoots	E shoots	810.21	1223.75	1096.01	1043.32	663.82	618.948	577.502	620.09	272.059	416.886	516.07	401.672	552.161	361.064	418.329	443.851	84.486	77.4367	162.465	108.129	C23H30N4O14	1.63734	141.0422, 137.0237, 281.0663, 146.0459, 128.0366
17	CV + hydroxybenzoic acid	424.099	4.58012e-05	4.41009e-05	4.28531	A shoots	B shoots	2672.71	2732.1	2719.61	2708.14	949.028	497.173	449.678	631.96	1872.09	1847.48	2459.69	2059.75	1581.99	1128.14	1292.21	1334.11	837.951	1047.82	952.235	946.002	C17H19N3O10	-2.40841	141.0178, 137.0244, 338.0896, 281.0677, 98.0126, 93.0347
18	butyryl CV	374.12	5.48604e-06	1.02806e-05	3.64736	C shoots	E shoots	10518.5	12750.7	11122	11463.7	7999.55	5670.28	5595.77	6421.87	12176.4	12232.3	15010.3	13139.7	3780.84	3185.42	4852.68	3939.65	2912.69	4167.18	3727.69	3602.52	C14H21N3O9	-0.532109	141.0185, 98.0126
19	VC + hydroxybenzoic acid	423.112	0.000528872	0.000253943	2.50736	A shoots	E shoots	1155.19	1102.73	1236.38	1164.77	832.947	616.939	550.537	666.807	632.137	775.657	855.642	754.478	1114.81	775.578	881.538	923.976	564.446	407.799	421.374	464.54	C17H20N4O9	-8.0752	141.0422, 140.0346, 137.0237, 93.03472
20	butyryl VC	373.136	1.93076e-06	5.19815e-06	3.95048	C shoots	E shoots	4508.69	5398.26	4644.69	4850.55	4596.82	5007.22	3672.84	4425.63	3876.56	4957.41	5921.3	4918.43	2193.78	1839.89	2597.19	2210.29	1349.6	1125	1260.46	1245.02	C14H22N4O8	-1.12438	141.0421, 140.0341, 99.0202, 98.0128
21	CV + C5H6O	386.119	3.40732e-05	3.54549e-05	3.85976	A shoots	D shoots	352.754	424.708	406.963	394.809	451.292	272.065	364.881	362.746	251.303	275.317	309.176	278.599	87.7142	107.852	111.299	102.288	141.392	243.756	208.228	197.792	C15H21N3O9	-4.20103	141.0178, 98.0125
22	VC + C5H6O	385.134	3.56191e-06	7.83218e-06	2.74148	B shoots	E shoots	134.055	175.175	174.932	161.387	200.509	197.241	208.31	202.02	88.0977	115.899	114.43	106.142	67.8824	86.2496	77.9934	77.3751	80.9202	66.4041	73.746	73.6901	C15H22N4O8	-5.24266	141.0399, 140.0320, 99.0186, 98.0010
23	(iso)valeryl CV	388.136	0.000170417	0.000111384	2.57138	C shoots	D shoots	33587.5	41629.8	34322.1	36513.2	25575	21232.3	20226.4	22344.6	50551.3	37366.4	43078.6	43665.4	14916.7	14980.9	21046.3	16981.3	15145.5	23561.5	21256.5	19987.8	C15H23N3O9	-0.420384	141.0165, 98.0105, 111.0182, 101.0587, 142.0237, 102.0177, 388.1375, 99.0178
24	(iso)valeryl VC	387.152	3.62824e-06	7.90164e-06	2.91864	C shoots	E shoots	15120.7	18808.9	15768.3	16566	16341.4	20275.4	14579.9	17065.6	18756.7	16739.4	19434.6	18310.2	11391.8	11354.9	14177.9	12308.2	6726.59	5674.35	6419.7	6273.55	C15H24N4O8	0.659819	141.0394, 140.0315, 387.1519, 99.0186, 139.0254, 101.0580
25	(iso)valeryl VC	387.15	2.2167e-05	2.61938e-05	3.49178	B shoots	C shoots	66.5406	96.701	92.3606	85.2007	107.799	156.691	129.456	131.315	37.3639	32.6297	42.8272	37.607	103.622	113.03	99.3535	105.335	64.1399	42.8298	45.9025	50.9574	C15H24N4O8	-4.62654	141.0394, 140.0315, 387.1519, 99.0186, 139.0254, 101.0580
26	CV coumaroyl Hex	612.167	4.26749e-06	8.78883e-06	8.80586	A shoots	D shoots	261.342	554.229	369.576	395.049	351.171	237.164	237.696	275.343	221.353	357.033	434.156	337.514	34.4357	42.4459	57.7047	44.8621	35.6548	54.6727	54.3482	48.2252	C25H31N3O15	-2.03193	141.0181, 145.0297, 364.1034, 450.1170, 163.0391, 111.0200
27	VC coumaroyl Hex	611.181	2.70941e-07	1.36725e-06	20.125	B shoots	D shoots	266.475	382.342	308.767	319.195	464.337	333.311	362.342	386.663	149.018	225.065	288.858	220.981	14.5401	11.654	31.4452	19.2131	24.2271	25.9374	18.8603	23.0083	C25H32N4O14	-4.7454	141.0415, 145.0294, 303.0925, 119.0503, 163.0406, 140.0345, 307.0835, 449.1262
28	CV caffeic acid	466.109	1.69425e-06	4.77189e-06	4.13981	A shoots	D shoots	3331.44	4772.7	4298.52	4134.22	3650.13	3007.53	2508.5	3055.39	3061.86	3552.76	4484.2	3699.61	1057.51	983.062	955.377	998.65	1323.91	1616.39	1410.59	1450.3	C19H21N3O11	-2.37881	161.0249, 141.0181, 133.0295, 135.0451, 380.0976, 179.0354, 304.0782
29	VC caffeic acid	465.124	2.58369e-06	6.31551e-06	4.35172	B shoots	E shoots	1800.75	2146.04	2122.87	2023.22	3147.76	3189.11	2321.21	2886.03	1431.49	1697.85	1961.59	1696.98	777.344	667.881	557.963	667.729	859.361	587.335	542.881	663.192	C19H22N4O10	-4.06166	141.0419, 161.0250, 133.0293, 140.0346, 135.0450, 303.0943
30	CV feruloyl Hex	642.178	5.40543e-07	2.2045e-06	8.73899	A shoots	D shoots	5506.14	8265.03	6948.46	6906.54	5173.34	4268.75	3612.14	4351.41	3029.58	5113.43	6182.64	4775.22	760.638	724.975	885.328	790.313	718.174	1004.81	922.056	881.68	C26H33N3O16	-1.24992	141.0180, 175.0397, 193.0502, 394.1133, 98.0127, 111.0198, 160.0160, 480.1243, 134.0369, 142.0256, 337.0916
31	VC feruloyl Hex	641.193	5.05571e-08	4.29961e-07	9.90782	A shoots	D shoots	4076.42	5364.19	4893.13	4777.91	5295.48	4364.22	4128.5	4596.06	1618.14	3082.55	3236.53	2645.74	512.835	452.633	481.242	482.236	552.708	478.759	473.416	501.627	C26H34N4O15	-3.4671	141.0415, 175.0398, 303.0938, 337.0921, 193.0498, 134.0363, 140.0336, 160.0165
32	CV sinapoyl Hex	672.189	0.00101126	0.000410974	3.87676	C shoots	D shoots	413.794	487.821	492.688	464.768	438.915	422.048	463.675	441.546	273.383	518.949	918.347	570.227	140.074	163.679	137.512	147.089	180.315	190.932	250.418	207.221	C27H35N3O17	-1.26239	141.0179, 223.0610, 205.0497, 424.1212, 164.0460, 111.0207, 98.0123, 190.0272
33	VC sinapoyl Hex	671.203	0.000715644	0.000316953	2.42795	B shoots	E shoots	481.195	500.282	483.816	488.431	603.71	505.538	544.1	551.116	288.67	493.936	560.85	447.818	339.574	248.941	279.455	289.323	249.004	196.881	235.079	226.988	C27H36N4O16	-4.19947	141.0428, 205.0498, 303.0967, 190.0277, 223.0608, 140.0361, 164.0474
34	CV coumaric acid	450.113	1.94352e-07	1.07042e-06	7.99404	C shoots	E shoots	557.518	750.98	659.2	655.9	1413.01	1411.53	1387.26	1403.93	1701.02	2626.13	2770.65	2365.93	1187.97	962.111	1011.41	1053.83	260.196	334.624	293.067	295.962	C19H21N3O10	-4.80401	141.0175, 145.0288, 163.0391
35	CV + C13H14O5	554.162	7.64644e-06	1.28247e-05	3.93492	A shoots	D shoots	1088.71	1241.09	1286.28	1205.36	1201.9	931.382	823.707	985.663	599.49	961.487	1015.9	858.959	328.597	297.349	293.024	306.324	484.446	480.116	507.285	490.615	C23H29N3O13	-1.02513	141.0175, 260.1679, 286.1477, 98.01192, 134.0368, 284.0353, 267.0887, 122.0371, 149.0567, 255.0302
36	VC + C13H14O5	553.177	2.2374e-05	2.63201e-05	3.26952	A shoots	D shoots	848.464	961.003	1008.18	939.216	934.541	1002.73	813.377	916.884	416.672	651.207	723.371	597.083	296.713	261.512	303.567	287.264	516.078	372.572	430.924	439.858	C23H30N4O12	-2.96436	141.0418, 134.0380, 140.0340, 99.0206
37	CV + C10H12O4	500.151	0.000551541	0.000261608	6.8283	E shoots	D shoots	1102.8	3096.65	3553.18	2584.21	3175.63	2697.77	2043.56	2638.99	1595.22	3203.58	3652.58	2817.13	552.502	484.139	502.486	513.042	3691.95	3188.14	3629.54	3503.21	C20H27N3O12	-1.74541	141.0179, 161.0450, 98.0128, 123.0810, 151.0773
38	CV ferulic acid	480.126	5.89265e-08	4.73297e-07	2.9186	A shoots	E shoots	75140.3	71230.9	75349.3	73906.8	67111.7	58523.4	49628.7	58421.3	63203.7	67431.5	68902.6	66512.6	32221.7	26728.2	26437.1	28462.3	25520.6	24615.7	25831.8	25322.7	C20H23N3O11	0.0861507	141.0164, 175.0386, 160.0152, 193.0493, 134.0354, 98.0106, 111.0181, 394.1145, 142.0236
39	VC ferulic acid	479.141	1.34851e-06	4.11745e-06	7.40552	A shoots	E shoots	28337.2	27512.1	31069.1	28972.8	29392.6	30082.2	21544.6	27006.4	21197.1	29318.9	31278.2	27264.7	7266.68	6185.81	3683.4	5711.96	5308.11	3273.24	3155.63	3912.33	C20H24N4O10	-2.94114	141.0401, 175.0382, 160.015, 140.032, 134.0352, 99.0179, 193.0491, 132.0192, 303.0936, 98.0104, 149.0582
40	VC + C10H12O4	499.166	0.0045067	0.00128234	6.72	B shoots	D shoots	740.026	2405.78	3262.09	2135.97	3722.5	4896.14	2677.08	3765.24	1398.19	2534.76	2835.36	2256.1	592.537	761.877	326.496	560.303	3076.41	2079.09	2874.16	2676.56	C20H28N4O11	-4.24751	141.0417, 140.0336, 99.0199, 303.0941
41	CV sinapinic acid	510.135	5.3101e-05	4.86513e-05	3.44606	C shoots	E shoots	1298.48	959.055	1118.34	1125.29	2880.59	1766.15	1548.25	2065	1779.02	2424.06	2555.98	2253.02	953.238	892.39	939.263	928.297	606.013	720.759	634.615	653.796	C21H25N3O12	-3.91605	327.0494, 141.0180, 299.0538, 205.0496, 297.0381, 357.0593, 190.0262, 298.0471, 284.0315
42	VC sinapinic acid	509.151	4.96071e-06	9.68256e-06	5.40664	B shoots	E shoots	1409.03	1039.69	1295.43	1248.05	3715.06	2798	2587.54	3033.53	1646.2	2458.31	2160.4	2088.3	1361.89	1381.9	1198.16	1313.98	713.1	486.93	483.194	561.075	C21H26N4O11	-3.95245	141.0416, 190.0266, 205.0500, 140.0336, 149.0239, 164.0469, 99.0200, 175.0027, 223.0605
43	feruloyl CV + C10H12O4	676.197	3.79443e-06	8.12313e-06	4.23009	A shoots	E shoots	5595.99	6116.36	5819.2	5843.85	5791.45	4600.22	4255.27	4882.31	3051.06	3894.06	5352.81	4099.31	2755	2393.67	2237.8	2462.16	1273.11	1360.16	1511.21	1381.5	C30H35N3O15	-3.07757	141.0182, 175.0397, 165.0547, 394.1108, 160.0148, 150.0327, 341.1008, 193.0517, 98.0121
44	feruloyl VC + C10H12O4	675.213	2.3722e-06	5.98538e-06	7.77707	A shoots	E shoots	7090.32	7359.8	7942.34	7464.15	6089	6586.49	5258	5977.83	2106.85	3927.41	3817.01	3283.76	3159.03	3628.55	2867.03	3218.21	1229.36	747.778	902.157	959.764	C30H36N4O14	-3.25568	141.0417, 175.0401, 150.0323, 165.0556, 140.0338, 193.0502, 134.0369, 303.0929, 99.0199
45	CV diferuloyl triHex	1142.33	0.000535485	0.000256182	9.07528	A shoots	E shoots	1583.75	2429.35	2591.21	2201.44	1011.61	1276.36	1164.76	1150.91	769.602	1307.44	1775.29	1284.11	581.217	423.635	736.647	580.5	107.372	477.557	142.795	242.575	C48H61N3O29	-2.42055	175.0410, 394.1184, 193.0519, 141.0183, 661.2069, 480.1313, 160.0170, 134.0367, 337.0968, 1142.3492, 304.0807
46	CV diferuloyl diHex	980.278	5.35333e-05	4.88921e-05	8.09536	A shoots	E shoots	1493.13	2649.1	2484.64	2208.96	1456.38	651.485	1154.44	1087.44	778.881	1005.66	1361.43	1048.66	407.857	534.421	457.435	466.571	207.192	270.607	340.802	272.867	C42H51N3O24	-1.25879	175.0411, 193.0516, 141.0178, 394.1169, 160.0171, 134.0377, 480.1288, 337.0963, 161.0257
47	VC diferuloyl triHex	1141.35	7.04953e-05	5.94454e-05	5.10052	A shoots	E shoots	4063.31	7174.35	8467.51	6568.39	5859.89	5417.44	4183.08	5153.47	2922.17	3732.43	4227.38	3627.33	3937.01	2893	3332.67	3387.56	1527.37	1114.64	1221.35	1287.79	C48H62N4O28	-2.25292	141.0421, 175.0408, 193.0515, 479.1454, 303.0966, 337.0955, 160.0168, 134.0372, 661.2063, 235.0626, 140.0343
48	VC diferuloyl diHex	979.292	5.97157e-07	2.34755e-06	12.8678	A shoots	E shoots	2595.07	4069.12	4694.43	3786.21	3384.1	2615.57	3382.08	3127.25	760.601	1271.28	1515.4	1182.43	1230.28	1155.54	1094.34	1160.06	280.398	282.383	319.938	294.24	C42H52N4O23	-2.85816	141.0420, 175.0409, 193.0517, 303.0969, 337.0949, 479.1468, 134.0376, 160.0171, 140.0343, 161.0248, 149.0609, 235.0625
49	CV diferuloyl Hex	818.224	1.65894e-05	2.17347e-05	16.9438	A shoots	E shoots	340.026	301.42	250.338	297.261	192.706	128.994	155.567	159.089	115.774	195.856	242.766	184.798	9.11861	15.2932	41.2562	21.8894	11.069	24.3478	17.215	17.5439	C36H41N3O19	-2.80967	175.0378, 141.0175, 394.1111, 193.0477, 160.0141, 480.1217, 149.0585, 134.0322, 111.0188, 337.0893
50	VC diferuloyl Hex	817.236	0.00183108	0.000642703	2.78493	B shoots	E shoots	188.951	197.392	269.205	218.516	253.82	150.103	277.045	226.989	92.1096	116.822	157.453	122.128	284.692	209.939	181.627	225.42	102.827	79.6743	62.0168	81.5061	C36H42N4O18	-7.50134	141.0423, 175.041, 193.0491, 303.0971, 337.0946
51	CV triferuloyl diHex	1156.32	1.47504e-05	2.00617e-05	3.28743	A shoots	D shoots	1921.25	1882.7	2150.16	1984.7	1480.4	1065.23	920.454	1155.36	904.382	1334.66	1245.11	1161.38	587.882	613.462	609.832	603.725	696.36	730.757	690.319	705.812	C52H59N3O27	-2.75084	175.0408, 193.0515, 394.1173, 160.0168, 141.0183, 480.1295, 134.0377, 161.0257, 337.0951, 235.0620
52	VC triferuloyl diHex	1155.34	1.5128e-05	2.04215e-05	3.67479	A shoots	E shoots	4064.22	4607.71	5149.24	4607.06	4943.51	3978.92	3582.03	4168.15	1907.14	2693.15	2762.76	2454.35	2070.13	2000.68	1575.72	1882.18	1517.65	996.973	1246.46	1253.69	C52H60N4O26	-4.17774	175.0407, 141.0420, 193.0515, 303.0962, 479.1464, 337.0947, 134.0376, 161.0247, 132.0213, 167.0217, 140.0341, 285.0852
53	CV + C7H10O3	446.14	8.33364e-06	1.35224e-05	3.55316	A shoots	D shoots	451.557	588.377	570.155	536.697	496.099	463.555	422.846	460.833	335.583	485.955	504.576	442.038	176.864	123.246	153.033	151.048	251.946	200.893	186.199	213.012	C17H25N3O11	-3.73834	141.0176, 159.066, 97.0663, 98.0139, 360.128, 142.0268
54	VC + C7H10O3	445.156	8.89298e-05	7.04498e-05	5.0985	B shoots	E shoots	134.169	159.202	185.42	159.597	233.837	331.976	265.954	277.256	85.1981	131.446	145.18	120.608	80.8955	43.4987	55.9223	60.1055	78.0206	44.4924	40.6264	54.3798	C17H26N4O10	-4.72447	141.0416, 140.0334, 159.069
55	CV + C7H10O3 VC	732.234	9.83303e-06	1.50835e-05	10.5262	B shoots	E shoots	63.9574	151.356	164.967	126.76	171.497	183.77	118.639	157.969	60.3808	84.481	87.3157	77.3925	23.2678	14.9237	18.803	18.9982	20.4807	10.4948	14.046	15.0072	C27H39N7O17	1.68602	141.0412, 141.0177, 159.0664, 427.1528, 445.1570, 360.1311, 183.0639, 646.2139, 303.0944
56	CV + C10H14O4 CV	789.247	0.195378	0.0264345	3.98846	C shoots	D shoots	71.2801	306.191	269.15	215.54	149.77	123.989	67.1892	113.649	231.112	400.795	443.361	358.423	2.83241	192.4	74.3625	89.865	142.246	144.459	152.869	146.525	C30H42N6O19	4.25485	141.0181, 484.1552, 416.1536, 153.0920, 215.0918, 459.1587, 502.1653, 197.0823, 111.0198, 142.0245, 398.1455, 171.1039, 161.0457, 456.1602, 746.2372, 703.2232, 789.2435, 261.0720, 304.0767
57	VC + C8H12O3 CV	746.247	0.193259	0.0261934	1.99236	A shoots	D shoots	53.2662	122.748	131.908	102.641	74.3543	88.2274	70.3757	77.6525	102.611	91.7856	99.39	97.9288	65.9188	52.1782	36.454	51.517	126.613	51.8345	62.9767	80.4747	C28H41N7O17	-1.50532	141.0417, 173.0813, 141.0201, 459.1774, 441.1649, 374.1475, 746.2532
58	CV + C10H14O4 VC	788.261	0.00122798	0.000473066	31.2184	C shoots	D shoots	103.36	398.269	800.085	433.905	510.941	627.964	315.94	484.949	267.199	1120.91	554.705	647.606	10.605	15.8951	35.7331	20.7444	317.104	120.071	65.4152	167.53	C30H43N7O18	2.93459	141.0419, 141.0177, 153.0924, 416.1543, 483.1723, 215.0926, 197.0803, 303.0950, 501.1815, 171.1023, 484.1575, 459.1606, 502.1678, 161.0454, 788.2613, 111.0230, 285.083
59	CV + C10H14O4	502.168	1.76213e-05	2.25553e-05	6.60685	C shoots	D shoots	3653.56	6293.67	6695.11	5547.45	5375	5920.57	3612.59	4969.39	7237.84	11675.8	13110.3	10674.6	1521.18	1726.04	1599.86	1615.69	8956.88	9650.46	9827.24	9478.19	C20H29N3O12	0.32641	141.0183, 153.0923, 197.0821, 416.1553, 215.0928, 171.1026, 98.0126, 459.1604, 125.0975, 161.0459, 135.0812, 502.1668, 142.0260, 304.0785, 111.0202
60	CV + C10H16O4	504.183	1.6185e-07	9.43532e-07	16.0512	C shoots	D shoots	480.678	965.774	902.696	783.049	426.928	381.526	290.325	366.26	1128.79	1389.57	1547.41	1355.26	87.9273	77.584	87.7897	84.4337	972.477	828.831	1002.98	934.763	C20H31N3O12	-1.17413	141.0180, 217.1080, 155.1077, 418.1712, 171.1029, 98.0124, 461.1746, 199.0981, 504.1831, 161.0465
61	VC + C10H14O4	501.184	1.24552e-05	1.79892e-05	9.36279	C shoots	D shoots	2139.97	3707.42	4161.94	3336.45	3098.89	4218.77	2907.3	3408.32	2511.09	5216.41	5352.89	4360.13	527.278	473.191	396.591	465.687	4973.87	3489.25	3502.87	3988.66	C20H30N4O11	-0.441765	141.0403, 140.0326, 303.0912, 153.0897, 171.1005, 99.0186, 215.0908, 125.0962
62	CV + C14H20O5	572.211	2.59319e-05	2.91533e-05	3.16605	A shoots	B shoots	700.76	799.668	762.802	754.41	291.342	244.408	179.093	238.281	341.426	475.523	455.801	424.25	304.771	302.441	296.294	301.169	405.501	334.501	389.458	376.486	C24H35N3O13	1.78961	141.0177, 285.1339, 111.0209, 161.0446
63	VC + C10H16O4	503.199	1.05036e-06	3.48725e-06	15.8929	C shoots	D shoots	319.974	606.203	592.502	506.226	349.918	428.17	302.428	360.172	483.337	793.171	837.152	704.554	51.9153	40.7838	40.2947	44.3313	577.909	362.911	393.705	444.842	C20H32N4O11	-0.710254	141.0420, 217.1088, 155.1081, 171.1032, 140.0347, 503.1978, 199.098, 299.0210, 418.1717
64	CV + C9H12O3	472.156	0.000280691	0.000159811	4.84923	A shoots	D shoots	1500.15	1208.31	918.97	1209.14	521.606	814.804	606.824	647.745	825.355	1152.01	1283.1	1086.82	341.667	179.662	226.713	249.348	591.743	1212.78	947.153	917.226	C19H27N3O11	-2.14067	141.0159, 123.0799, 141.0907, 98.01130, 185.0793, 161.0450, 386.1417, 69.0328, 142.0231, 111.0189, 304.0761
65	VC + C12H16O4 CV	814.274	4.18793e-06	8.69933e-06	24.392	A shoots	E shoots	342.774	768.676	770.56	627.336	495.017	550.346	435.088	493.484	331.356	632.762	843.45	602.523	113.336	88.5838	171.026	124.315	28.0051	33.3962	15.7556	25.719	C32H45N7O18	-1.50081	141.0419, 141.0183, 303.0954, 181.0847, 285.0857, 468.1632, 345.1049, 111.0194, 509.1783
66	VC + C14H20O5	571.224	0.00264852	0.00085139	2.76227	A shoots	B shoots	313.231	317.555	385.252	338.679	114.715	166.494	86.6173	122.609	116.657	171.777	156.827	148.42	210.362	192.9	193.448	198.903	187.483	88.8419	136.997	137.774	C24H36N4O12	-2.69882	141.0401, 140.0332, 285.1293, 303.0947
67	CV + C9H14O3	474.173	0.00703462	0.00181683	49.5701	C shoots	E shoots	657.554	1784.68	81.0876	841.108	23.9996	127.65	48.6673	66.7722	2176.68	1076.14	810.616	1354.48	8.92334	12.6114	174.535	65.3564	11.3344	3.67951	66.9594	27.3245	C19H29N3O11	0.26233	141.0156, 187.0956, 125.0949, 388.1617, 98.0107, 169.0855, 111.0179, 161.0437
68	VC + C12H16O4 VC	813.288	8.52137e-05	6.8287e-05	35.815	A shoots	E shoots	235.026	599.489	621.403	485.306	217.342	557.686	446.524	407.184	130.311	152.211	268.357	183.626	98.9744	172.828	383.919	218.574	18.1262	5.81252	16.7124	13.5504	C32H46N8O17	-3.70183	141.0413, 303.0940, 467.1779, 315.0124, 139.0264, 285.0851, 345.1014, 140.0340, 271.0217
69	VC + C9H12O3	471.171	0.000953277	0.000393165	13.7929	A shoots	D shoots	1209.85	880.621	676.243	922.238	244.194	989.153	372.341	535.229	284.161	457.377	533.768	425.102	131.155	22.4216	47.0131	66.8631	236.577	137.66	174.797	183.011	C19H28N4O10	-5.02621	141.0398, 140.0320, 99.0185, 303.0910, 141.0902, 191.0692, 123.0802, 98.0116
70	CV + C10H14O3 CV	773.244	0.0023354	0.000774211	6.54655	A shoots	D shoots	6622.34	9446.12	10500.6	8856.36	3136.02	704.709	922.391	1587.71	7682.17	6842.57	4984.41	6503.05	648.457	1073.77	2336.26	1352.83	6868.26	8237.61	2807.33	5971.07	C30H42N6O18	-5.3431	141.0184, 400.1639, 468.1658, 137.0971, 155.1079, 111.0197, 199.0985, 161.0454, 486.1765, 142.0255, 382.1532, 687.2443, 181.0877, 98.0122, 730.2515, 443.1683, 773.2543, 304.0806, 188.0568, 153.0301, 283.026
71	CV + C12H16O4	528.18	0.0130653	0.00293448	5.59264	C shoots	E shoots	1263.61	1661.76	1735.07	1553.48	1881.65	1084.65	1731.62	1565.97	2653	4044.01	6005.83	4234.28	1584.98	1767.51	1443.65	1598.72	1701.39	214.454	355.504	757.117	C22H31N3O12	-6.77798	141.0186, 161.0458, 181.0879, 59.0141, 137.097, 197.1199, 163.0769
72	VC + C14H22O5 VC	859.33	0.000744561	0.000326149	10.7028	B shoots	E shoots	112.07	381.347	416.453	303.29	333.244	533.321	419.938	428.834	92.8781	260.697	232.393	195.323	131.883	132.438	188.552	150.958	39.0261	43.1517	38.0252	40.0676	C34H52N8O18	-3.08642	141.0417, 303.0951, 345.1027, 285.0851, 139.0278, 508.2873
73	CV C10H16O3 CV	775.266	2.66586e-05	2.97621e-05	4.14391	A shoots	B shoots	1711.48	2578.37	2969.29	2419.71	898.302	457.963	395.496	583.921	2105.7	2083.54	1781.3	1990.18	642.257	657.287	622.398	640.647	2154.79	2011.68	2064.74	2077.07	C30H44N6O18	2.68566	141.0187, 402.1809, 201.1143, 183.1034, 470.1817, 488.1928, 161.0456, 111.0201, 139.1130, 689.2588, 142.0260, 384.1699, 445.1860, 153.0315, 732.2668, 98.0120, 188.0567
74	CV + C12H18O4	530.198	0.00158405	0.000574476	2.49995	C shoots	E shoots	697.584	1095.23	745.128	845.98	648.692	529.647	556.446	578.262	697.176	1156.96	1219.68	1024.61	636.52	581.702	641.727	619.983	406.728	375.869	446.957	409.851	C22H33N3O12	-2.03481	141.0180, 183.1023, 139.1127, 243.1240, 181.1235, 444.1866, 59.0149, 161.0482, 98.0129
75	VC + C9H14O3	473.187	0.0035094	0.00105753	2.44595	C shoots	E shoots	324.948	380.26	249.246	318.151	191.108	329.21	313.133	277.817	290.174	360.427	372.156	340.919	129.354	177.21	245.751	184.105	119.363	148.573	150.208	139.381	C19H30N4O10	-3.50798	141.0397, 140.0312, 125.0957, 59.0118, 187.0968
76	VC + C10H14O3 CV	772.265	0.000782418	0.000338679	2.74277	A shoots	D shoots	23921.2	26362.2	37330.7	29204.7	21418.4	16259.5	11084.2	16254	13846	16976.8	16096.9	15639.9	9994.53	10965.5	10983.7	10647.9	12751.7	11452.6	12206.3	12136.9	C30H43N7O17	0.386033	141.0357, 467.1822, 485.1936, 303.0966, 155.1083, 686.261, 400.1638, 137.0973, 772.2743, 199.0984, 468.1660, 111.0201, 140.0342
77	VC + C12H16O4	527.198	2.70397e-05	3.00383e-05	3.61141	A shoots	E shoots	396.479	427.759	450.153	424.797	333.62	241.991	332.519	302.71	183.44	303.522	297.39	261.451	415.16	351.219	333.791	366.723	131.726	108.677	112.478	117.627	C22H32N4O11	-3.27031	141.0427, 59.0140, 140.0353, 144.0781, 99.0192, 303.0946
78	CV + C14H22O5	574.224	0.000831619	0.000355453	2.90158	A shoots	E shoots	828.352	873.485	743.174	815.004	530.678	438.004	397.018	455.234	385.03	757.352	787.155	643.179	353.452	331.426	439.565	374.814	252.551	295.243	294.855	280.883	C24H37N3O13	-2.77666	141.0178, 59.0144, 209.1177, 227.1289, 111.0200, 161.0448, 142.0255, 346.0899, 98.0123, 207.1377, 287.1493, 153.0306, 304.0772
79	VC + C10H16O3 CV	774.281	0.000293897	0.00016514	3.1642	A shoots	D shoots	4984.7	7454.81	8185.78	6875.1	4056.37	2883.58	2354.2	3098.05	4442.08	4628.35	4923.97	4664.8	2102.18	2458.72	1957.42	2172.77	3838.18	2965.78	3796.38	3533.45	C30H45N7O17	0.993683	141.0377, 201.1141, 487.2081, 469.1968, 402.1802, 688.2757, 183.1030, 139.1127, 774.2883, 140.0340, 303.0960, 111.0199, 153.0329, 139.0261, 731.2805
80	VC + C10H14O3 VC	771.279	0.000689509	0.000308627	3.03768	A shoots	E shoots	11717	15946.7	22012.8	16558.8	15356.6	16767.8	8999.74	13708.1	4373.21	6212.53	6110.15	5565.3	6938.08	8179.45	7382.75	7500.09	6902.04	4594.62	4856.79	5451.15	C30H44N8O16	-2.09664	141.0423, 303.0964, 140.0342, 467.1817, 485.1926, 155.1076, 139.0258, 199.0977, 137.0970, 771.2884, 183.0524, 285.0849, 265.1095, 153.0406, 223.1001, 152.0469
81	VC + C12H18O4	529.213	0.000282097	0.000160284	3.34162	C shoots	E shoots	508.811	696.483	567.588	590.961	468.7	526.83	479.292	491.607	436.675	874.276	869.553	726.834	473.247	487.335	490.123	483.568	230.979	201.367	220.184	217.51	C22H34N4O11	-3.82287	141.0417, 140.0341, 183.1021, 99.0206, 139.1125, 243.1228, 469.1927, 225.1128
82	VC + C14H22O5	573.239	0.00880795	0.0021587	3.52507	A shoots	E shoots	1244.53	1485.59	1397.72	1375.95	1201.17	1403.11	1123.14	1242.48	434.692	1210.13	1260.15	968.321	1324.15	614.838	1368.79	1102.59	436.926	338.647	395.42	390.331	C24H38N4O12	-3.73413	141.0421, 303.0943, 140.0340, 227.1296, 59.0148, 99.0211, 345.1065, 285.0855, 139.0285
83	VC + C10H16O3 VC	773.295	0.00098947	0.000404067	4.08768	A shoots	D shoots	1876.19	3610.67	4292.87	3259.91	2220.38	2122.62	1718.89	2020.63	1225.13	1458.23	1629.42	1437.59	760.654	1000.65	631.189	797.497	1562.35	904.988	1010.69	1159.34	C30H46N8O16	-1.20132	141.0422, 487.2077, 201.1137, 469.1963, 140.0339, 183.1028, 139.0262, 303.0953, 773.3079, 402.1794, 285.1363
84	CV + C10H14O3	486.172	0.00230554	0.000766441	2.34341	A shoots	B shoots	18514.6	14971.4	19570.1	17685.4	10891.8	6033.05	5715.73	7546.87	12166	12176.7	9701.01	11347.9	6694.48	9591.52	7296.41	7860.8	12025.2	10126.5	11872.5	11341.4	C20H29N3O11	-1.40049	141.0184, 155.1083, 98.0121, 199.0980, 161.0455, 400.1632, 137.0971, 142.0257, 153.0307
85	VC + C10H14O3	485.186	0.00741073	0.00189095	2.06783	A shoots	E shoots	13194.5	12417.5	15989.9	13867.3	11047.4	7709.21	6826.31	8527.63	10599.6	10967.1	9902.92	10489.9	6269.89	9202.48	5780.06	7084.14	8594.73	5022.25	6501.63	6706.2	C20H30N4O10	-5.46285	141.0424, 140.0340, 155.1082, 99.0199, 164.0477, 137.0973, 199.0981, 139.0261
86	CV + C10H16O3	488.187	1.78507e-05	2.27082e-05	5.25735	A shoots	D shoots	3499.26	3471.72	4129.54	3700.17	2252.38	1458.31	1169.15	1626.61	2648.11	2598.38	2235.72	2494.07	550.917	903.303	657.207	703.809	1932.06	1731.4	2127.21	1930.22	C20H31N3O11	-2.22987	141.0172, 201.1140, 139.1126, 183.1030, 402.1787, 98.0117, 161.0448, 142.0245
87	VC + C10H14O3	485.187	1.54646e-05	2.07165e-05	3.33203	A shoots	C shoots	7989.2	6070.12	10176	8078.44	10223.7	7207.68	6415.15	7948.85	2190	2702.41	2381.03	2424.48	2046.87	3061.18	2602.67	2570.24	3067.35	2458.43	2723.44	2749.74	C20H30N4O10	-3.22796	141.0424, 140.0340, 155.1082, 99.0199, 164.0477, 137.0973, 199.0981, 139.0261
88	VC + C10H16O3	487.203	4.94638e-05	4.63016e-05	5.0502	A shoots	D shoots	3263.15	3322.52	4522.64	3702.77	3222.93	2588.87	1864.67	2558.82	2027.8	1952.49	1835.56	1938.62	614.117	980.759	604.705	733.194	1562.11	885.158	1103.33	1183.53	C20H32N4O10	-3.21219	141.0420, 140.0337, 201.1139, 139.1122, 183.1024, 99.0197, 225.1138, 98.012, 239.1300
